# Supplementary material for: Assessment of Mancozeb Exposure, Absorbed Dose, and Oxidative Damage in Greenhouse Farmers
Source: MDPI journal article supplement (doi:10.3390/ijerph191710486), 2022-08-23
Supplement: s1 [file s1]

**Supplementary Material****ASSESSMENT OF MANCOZEB EXPOSURE, ABSORBED DOSE AND OXIDATIVE DAMAGE IN GREENHOUSE FARMERS**Chiara Costa<sup>1</sup>, Michele Teodoro<sup>2</sup>, Federica Giambò<sup>2</sup>, Stefania Catania<sup>2</sup>, Silvia Vivarelli<sup>2\*</sup>, Concettina Fenga<sup>2</sup>**Supplementary Table S1.** Electrospray ionization interface (ESI) voltage settings.

| MS detection parameters      |     |
|------------------------------|-----|
| Capillary (kV)               | 0.3 |
| Cone (V)                     | 31  |
| Extractor (V)                | 3   |
| RF Lens (V)                  | 0.4 |
| Source temperature (°C)      | 130 |
| Desolvation temperature (°C) | 450 |
| Cone gas flow (l/h)          | 51  |
| Desolvation gas flow (l/h)   | 800 |

**Supplementary Table S2.** Mass spectra (MS) detection and selected ion.

| Selected ion                        | Parents (m/z) | Daughter (m/z) | Identifier (m/z) | Collision (V) | Retention time (min) |
|-------------------------------------|---------------|----------------|------------------|---------------|----------------------|
| ETU                                 | 102.9         | <b>44.1</b>    |                  | 22            |                      |
|                                     |               | 59.9           | 44.1             | 31            | 2.045                |
|                                     |               | 102.9          |                  | 11            |                      |
|                                     |               | 48.1           |                  | 22            |                      |
| [ <sup>2</sup> H <sub>4</sub> ]-ETU | 106.9         | <b>63.9</b>    | 63.9             | 22            | 1.95                 |
|                                     |               | 106.9          |                  | 12            |                      |

Note: Bold characters are used for daughter ions quantifiers

**Supplementary Table S3.** Limit of detection (LOD) and limit of quantification (LOQ) for pad and urine samples.

| Matrix       | LOD (µg/l)<br>(n=10) | Accuracy<br>(% ± SD) | Precision<br>%CV | LOQ (µg/l)<br>(n=10) | Accuracy<br>(% ± SD) | Precision<br>%CV |
|--------------|----------------------|----------------------|------------------|----------------------|----------------------|------------------|
| Water (pads) | 0.2078±0.0135        | 103.90±0.065         | 20.40            | 0.2497±0.0039        | 99.88±0.016          | 5.65             |
| Urine        | 0.2086±0.0085        | 101.80±0.0229        | 6.8              | 0.2545±0.0058        | 101.80±0.0229        | 6.8              |

SD, Standard deviation; CV, Coefficient of variation

**Supplementary Table S4.** Intraday accuracy and precision of the assay at three different concentration levels.

| Matrix       | n  | Concentration<br>( $\mu\text{g/l}$ ) | ETU Concentration Mean obtained<br>( $\mu\text{g/l}$ ) | Accuracy<br>(% $\pm$ SD) | Precision<br>%CV |
|--------------|----|--------------------------------------|--------------------------------------------------------|--------------------------|------------------|
| Water (pads) | 15 | 0.5                                  | 0.507                                                  | 101.48 $\pm$ 1.07        | 5.58             |
|              |    | 5                                    | 5.091                                                  | 101.41 $\pm$ 1.51        | 5.42             |
|              |    | 50                                   | 50.433                                                 | 100.87 $\pm$ 0.93        | 4.16             |
| Urine        | 15 | 0.5                                  | 0.544                                                  | 108.76 $\pm$ 2.82        | 8.62             |
|              |    | 5                                    | 5.122                                                  | 102.45 $\pm$ 1.51        | 5.38             |
|              |    | 50                                   | 50.464                                                 | 100.93 $\pm$ 0.93        | 4.16             |

**Supplementary Table S5.** Interday precision and accuracy of the assay at three different concentration levels.

| Matrix       | n  | Concentration<br>( $\mu\text{g/l}$ ) | Mean obtained ETU<br>Concentration (ng/ml) | Accuracy<br>(% $\pm$ SD) | Precision<br>%CV |
|--------------|----|--------------------------------------|--------------------------------------------|--------------------------|------------------|
| Water (pads) | 18 | 0.5                                  | 0.510                                      | 102.09 $\pm$ 2.65        | 6.50             |
|              |    | 5                                    | 4.956                                      | 99.12 $\pm$ 3.52         | 9.03             |
|              |    | 50                                   | 50.085                                     | 100.17 $\pm$ 4.30        | 9.34             |
| Urine        | 18 | 0.5                                  | 0.508                                      | 101.63 $\pm$ 2.76        | 6.14             |
|              |    | 5                                    | 4.997                                      | 99.94 $\pm$ 3.58         | 9.25             |
|              |    | 50                                   | 50.917                                     | 101.83 $\pm$ 2.07        | 2.84             |
